# Supplementary material for: Improving Clostridioides difficile Infectious Disease Treatment Response via Adherence to Clinical Practice Guidelines
Source: MDPI journal article supplement (doi:10.3390/antibiotics13010051), 2024-01-04
Supplement: s1 [file s1]

## Supplementary Material S1. PICO chart of the study objectives

### Primary objective 1.

**P:** All cases with diarrhea, confirmed *C. difficile* A and/or B toxins in stools, severe also non-severe CDID, and concordant also non-concordant treatment

**I:** Concordant with Guidelines treatment

**C:** Non-concordant with Guidelines treatment

**O:** CDID-related Intensive Care Unit admission, CDID-related mortality, 30-day survival, 30-day all-cause-mortality.

### Primary objective 2.

**P:** All cases with diarrhea, confirmed *C. difficile* A and/or B toxins in stools, blood leucocyte count  $< 15 \times 10^9/L$ , creatinine serum level  $\leq 133 \mu\text{mol/L}$ , and concordant also non-concordant treatment

**I:** Concordant with Guidelines treatment

**C:** Non-concordant with Guidelines treatment

**O:** CDID-related Intensive Care Unit admission, CDID-related mortality

### Primary objective 3.

**P:** Cases with diarrhea, confirmed *C. difficile* A and/or B toxins in stools, blood leucocyte count  $\geq 15 \times 10^9/L$ , creatinine serum level  $> 133 \mu\text{mol/L}$ , and concordant also non-concordant treatment

**I:** Concordant enteral vancomycin treatment (Group V)

**C:** Non-concordant enteral metronidazole treatment (Group M)

**O:** Treatment failure (refractory CDID)

### Primary objective 4.

**P:** Patients with diarrhea, confirmed *C. difficile* A and/or B toxins in stools, and non-concordant enteral metronidazole treatment (Group M)

**I:** Blood leucocyte count  $\geq 15 \times 10^9/L$ , **and** creatinine serum level  $> 133 \mu\text{mol/L}$

**C:** Blood leucocyte count  $\geq 15 \times 10^9/L$ , **or** creatinine serum level  $> 133 \mu\text{mol/L}$

**O:** CDID-related Intensive Care Unit admission, CDID-related mortality

### Secondary objective 1.

**P:** Patients with diarrhea, confirmed *C. difficile* A and/or B toxins in stools, severe also non-severe CDID, and concordant treatment

**I:** CCI score  $\geq 5$

**C:** CCI score  $< 5$

**O:** 30-day survival, 30-day all-cause mortality

**Secondary objective 2.**

**P:** Patients with diarrhea, confirmed *C. difficile* A and/or B toxins in stools, severe also non-severe CDID, and concordant treatment

**I:** Continuation of concomitant antibiotics

**C:** Discontinuation of concomitant antibiotics

**O:** 30-day survival, 30-day all-cause mortality

**Secondary objective 3.**

**P:** Patients with diarrhea, confirmed *C. difficile* A and/or B toxins in stools, severe also non-severe CDID, and concordant also non-concordant treatment

**I:** The use of CDID precipitating broad-spectrum antibiotics also vancomycin for primary CDID treatment in 2011-2016 (Group 1)

**C:** The use of CDID precipitating broad-spectrum antibiotics also vancomycin for primary CDID treatment in 2017-2020 (Group 2)

**O:** Rate of CDID
